# Supplementary material for: Fueling sentinel node via reshaping cytotoxic T lymphocytes with a flex-patch for post-operative immuno-adjuvant therapy
Source: Nat Commun. 2023 May 2;14:2518. doi: 10.1038/s41467-023-38245-7 (PMC10154421; doi:10.1038/s41467-023-38245-7)
Supplement: Supplementary file 1 — Supplementary Information [file 41467_2023_38245_MOESM1_ESM.pdf]

## Supplementary Information for

### **Fueling sentinel node via reshaping cytotoxic T lymphocytes with a flex-patch for post-operative immuno-adjuvant therapy**

Bei Li<sup>1,2,3</sup>, Guohao Wang<sup>1,2,3</sup>, Kai Miao<sup>1,2,3</sup>, Aiping Zhang<sup>1,2</sup>, Liangyu Sun<sup>1</sup>, Xinwang Yu<sup>1,2</sup>, Josh Haipeng Lei<sup>1,2</sup>, Lisi Xie<sup>1,2</sup>, Jie Yan<sup>1,2</sup>, Wenxi Li<sup>1,2</sup>, Chu-Xia Deng<sup>1,2\*</sup>, Yunlu Dai<sup>1,2\*</sup>

<sup>1</sup>Cancer Centre and Institute of Translational Medicine, Faculty of Health Sciences, University of Macau, Macau SAR 999078, China.

<sup>2</sup>MoE Frontiers Science Center for Precision Oncology, University of Macau, Macau SAR 999078, China.

<sup>3</sup>These authors contributed equally.

\*E-mail: [yldai@um.edu.mo](mailto:yldai@um.edu.mo) (Y. D.); [cx Deng@um.edu.mo](mailto:cx Deng@um.edu.mo) (C. D.)

## Supplementary figures

**a**

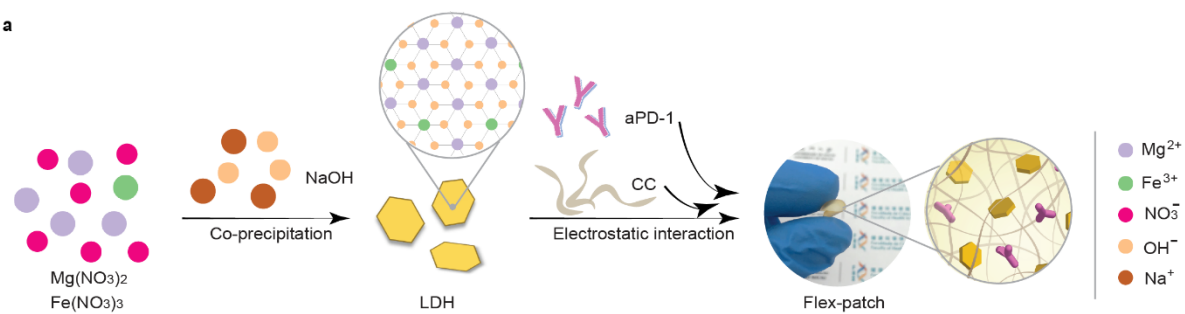

**b**

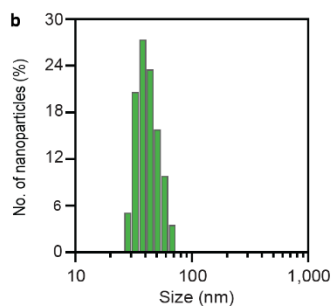

**c**

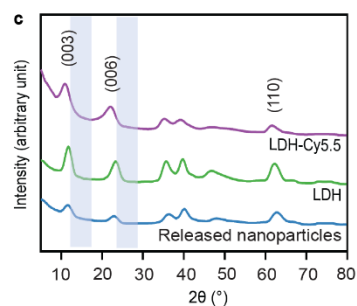

**d**

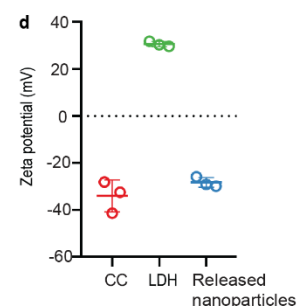

**e**

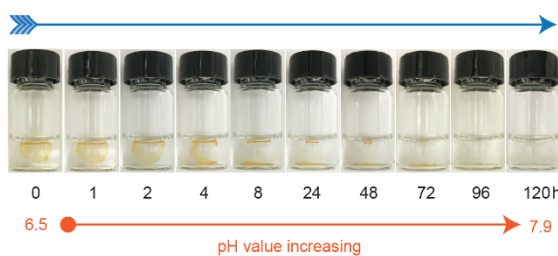

**f**

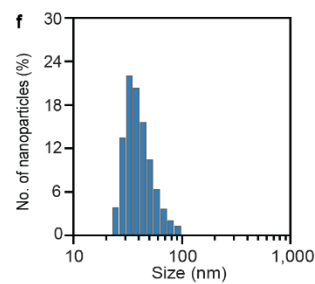

**g**

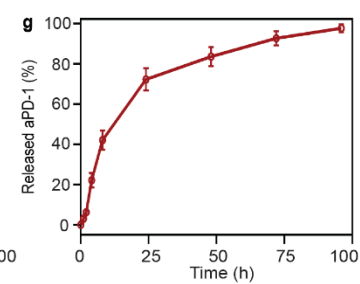

**h**

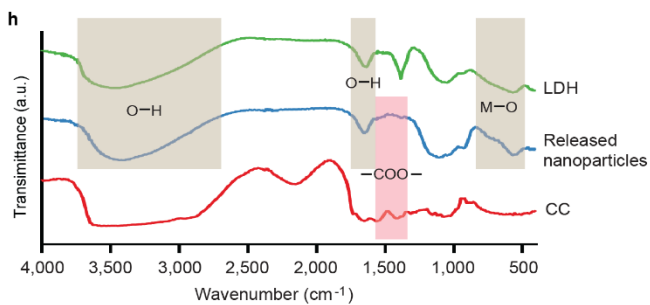

**i**

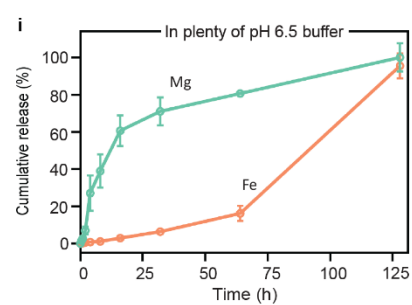

**j**

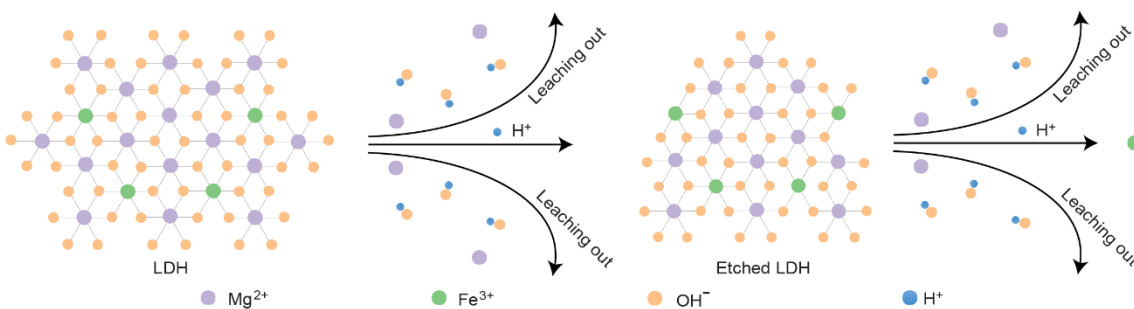

**Supplementary Figure 1. Supplementary characterization of the flex-patch.** **a**, The schematic illustration of the flex-patch design. **b**, Hydrodynamic size of LDH nanosheets determined by dynamic light scattering (DLS). **c**, XRD patterns of different samples. **d**, Zeta potentials of different samples. **e**, Representative photos to exhibit the in vitro disassembling of the patch in pH 6.5 phosphate buffer. **f**, Hydrodynamic size of disassembled nanoparticles determined by DLS. **g**, Cumulative release profile of aPD-1 from patch in pH 6.5 phosphate buffer. **h**, Fourier transform infrared spectroscopy (FTIR) of different samples. **i**, Cumulative etching of LDH in plenty of pH 6.5 phosphate buffer. **j**, Schematic illustrating the LDH degrading process. For (**d,g,i**),  $n = 3$  per group; data are presented as the mean  $\pm$  SD. For (**b,c,f,h**), experiments were performed three times independently with similar results. Source data are provided as a Source Data file.

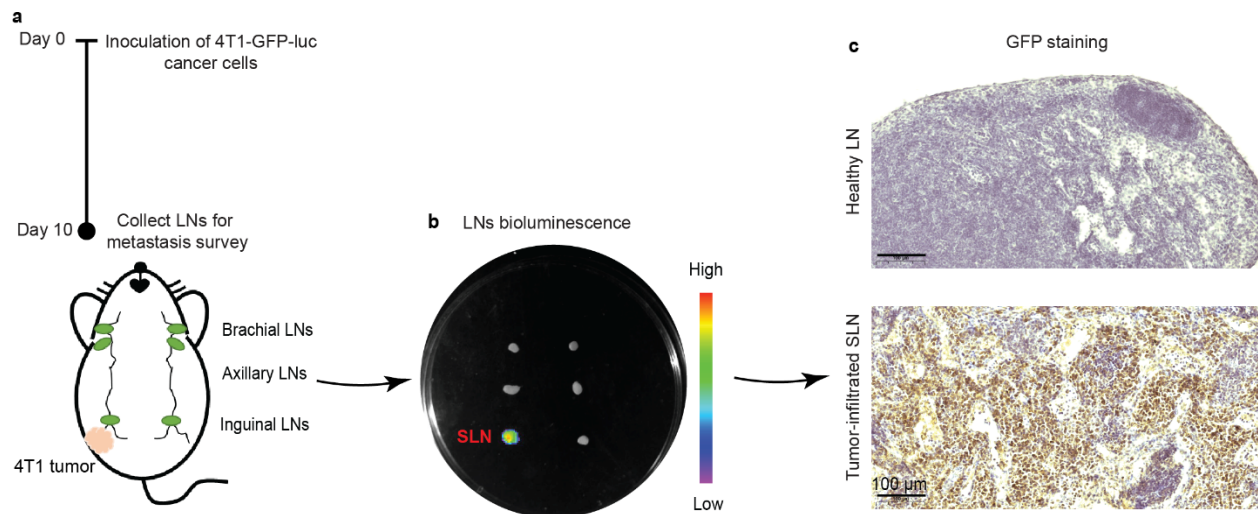

**Supplementary Figure 2. SLN metastatic tracking in postsurgical 4T1 BC mouse model.** **a**, Schematic illustrating the inoculation of 4T1-GFP-luc cancer cells to survey SLN metastasis. **b**, Ex vivo bioluminescence of LNs collected from 4T1-tumor model on Day 10 postinoculation. Here, LNs include two brachial LNs, two axillary LNs, and two inguinal LNs. The one next to the 4T1 primary tumor is regarded as SLN, which exhibited bioluminescence. **c**, IHC staining of GFP (4T1 marker) in healthy LN (up) and in metastatic SLN (down). Scale bar: 100  $\mu$ m.  $n = 3$  mice per group.

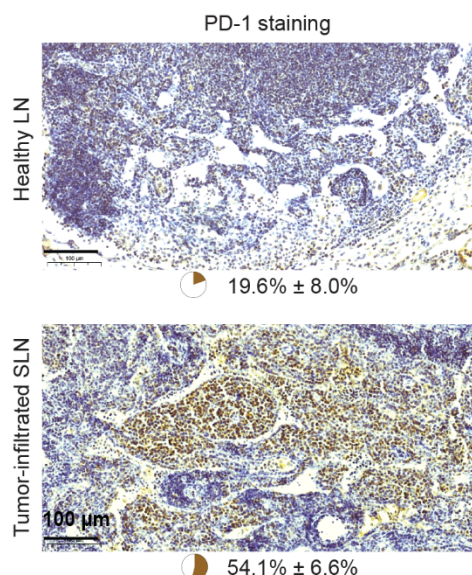

**Supplementary Figure 3. PD-1 expression in the LN analyzed by IHC staining.** PD-1 staining in healthy LNs (up) and in metastatic SLNs (down). For metastatic SLNs, IHC analysis was carried out on Day 10 postinoculation of the 4T1 BC mouse model. Scale bar: 100 μm. n = 3 mice per group. Data are presented as the mean ± SD. Source data are provided as a Source Data file.

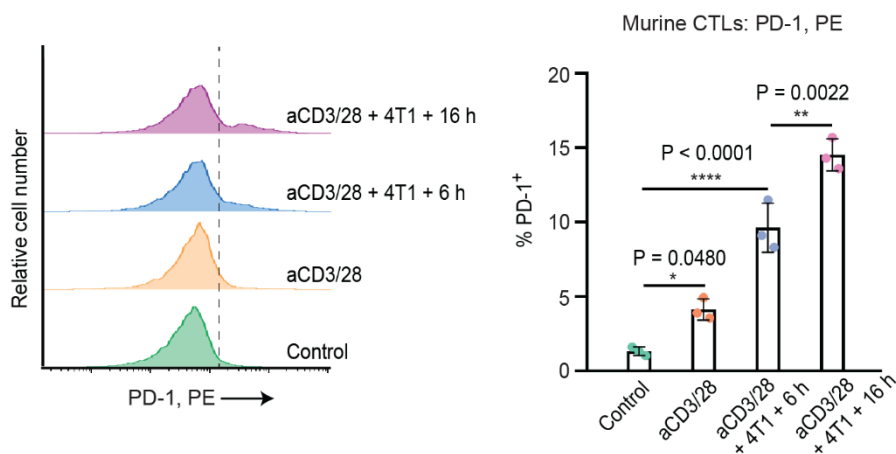

**Supplementary Figure 4. PD-1 expression of murine CTLs stimulated by 4T1 cancer cells.** Here, murine CTLs were pre-activated by aCD3/28. Prolonging the coculture of 4T1 cancer cells and murine CTLs could upregulate the surface PD-1 expression of CTLs. n = 3 per group. Data are presented as the mean ± SD, and statistical significance was calculated via one-way ANOVA with Tukey's multiple comparisons. Source data are provided as a Source Data file.

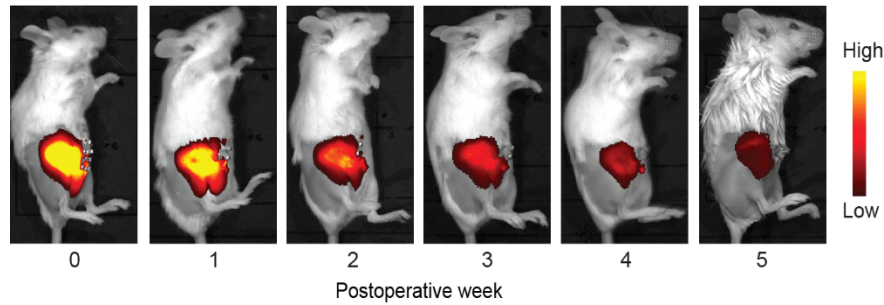

**Supplementary Figure 5. In vivo biodistribution of the flex-patch at different time points.** Fluorescence IVIS images depicting the sustained retention and disassembly of the implanted patch in vivo.  $n = 3$ .

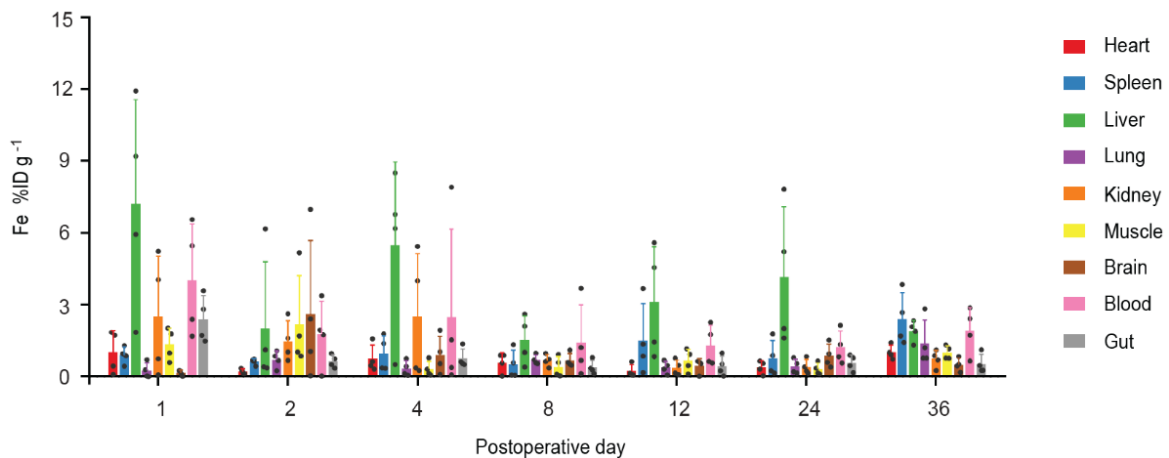

**Supplementary Figure 6. In vivo biodistribution of the flex-patch in main tissues of mice at different time points.** Concentrations of released items were normalized as the percentage of accumulated dose of Fe per gram of each organ ( $\%ID\ g^{-1}$ ).  $n = 4$  at each time point. Data are presented as the mean  $\pm$  SD. Source data are provided as a Source Data file.

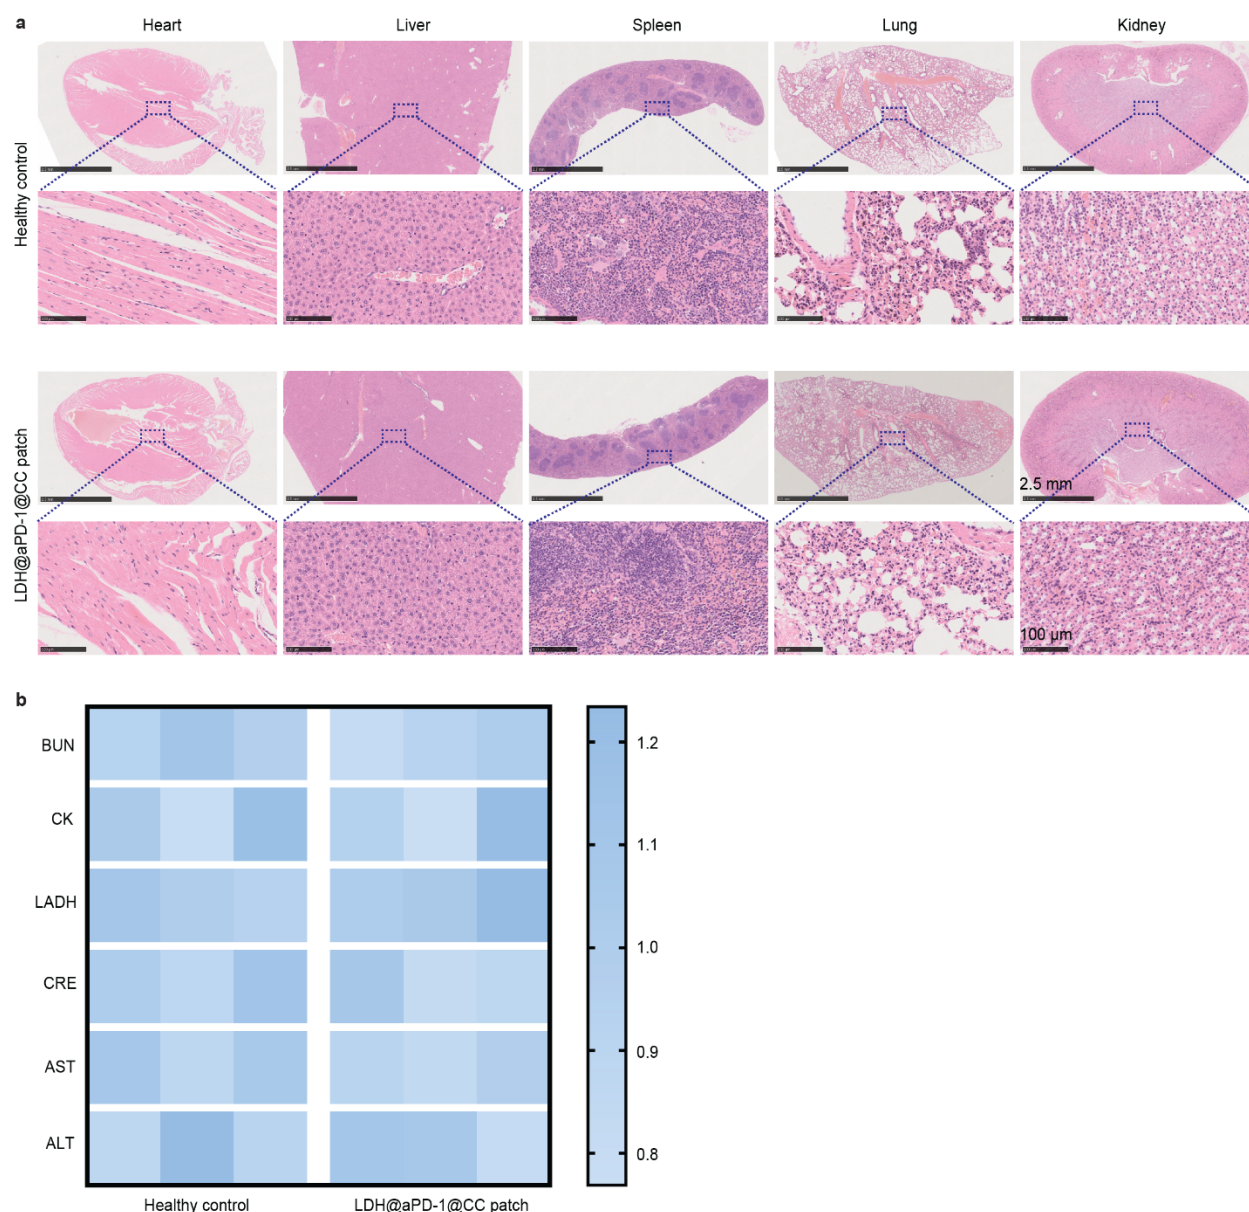

**Supplementary Figure 7. In vivo biosafety of the flex-patch.** **a**, Hematoxylin and eosin (H&E) staining of major organs harvested from healthy mice and patch-treated mice on Day 36 postsurgery. Scale bar: 2.5 mm (low-magnification image); scale bar: 100  $\mu$ m (high-magnification image). **b**, Heatmap exhibiting the relative biochemical levels in murine sera from healthy group and patch-treated group. BUN, blood urea nitrogen; CK, creatine kinase; LADH, lactate dehydrogenase; CRE, creatinine; AST, aspartate transaminase; ALT, alanine aminotransferase.  $n = 3$  per group. Source data are provided as a Source Data file.

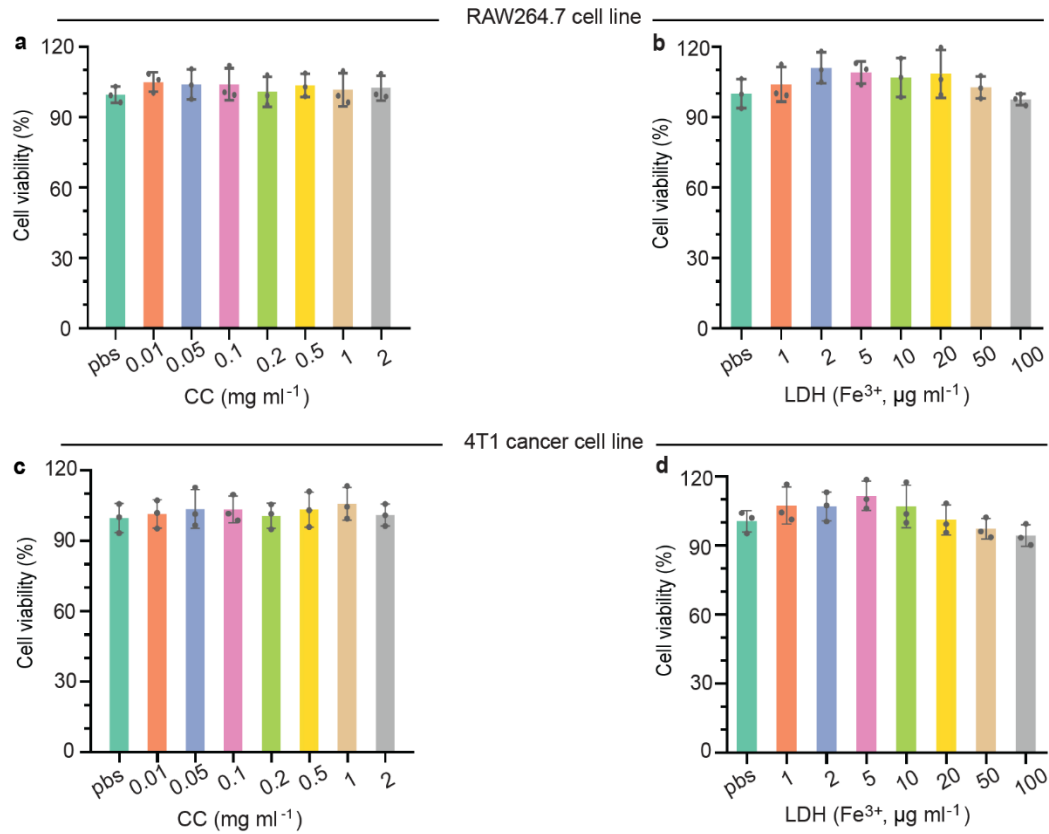

**Supplementary Figure 8. Cellular cytotoxicity of the flex-patch. a-d**, Cellular cytotoxicity of CC matrix (**a,c**) and LDH adjuvant (**b,d**), measured by a MTT assay. n = 3 at each concentration point. Data are presented as the mean  $\pm$  SD. Source data are provided as a Source Data file.

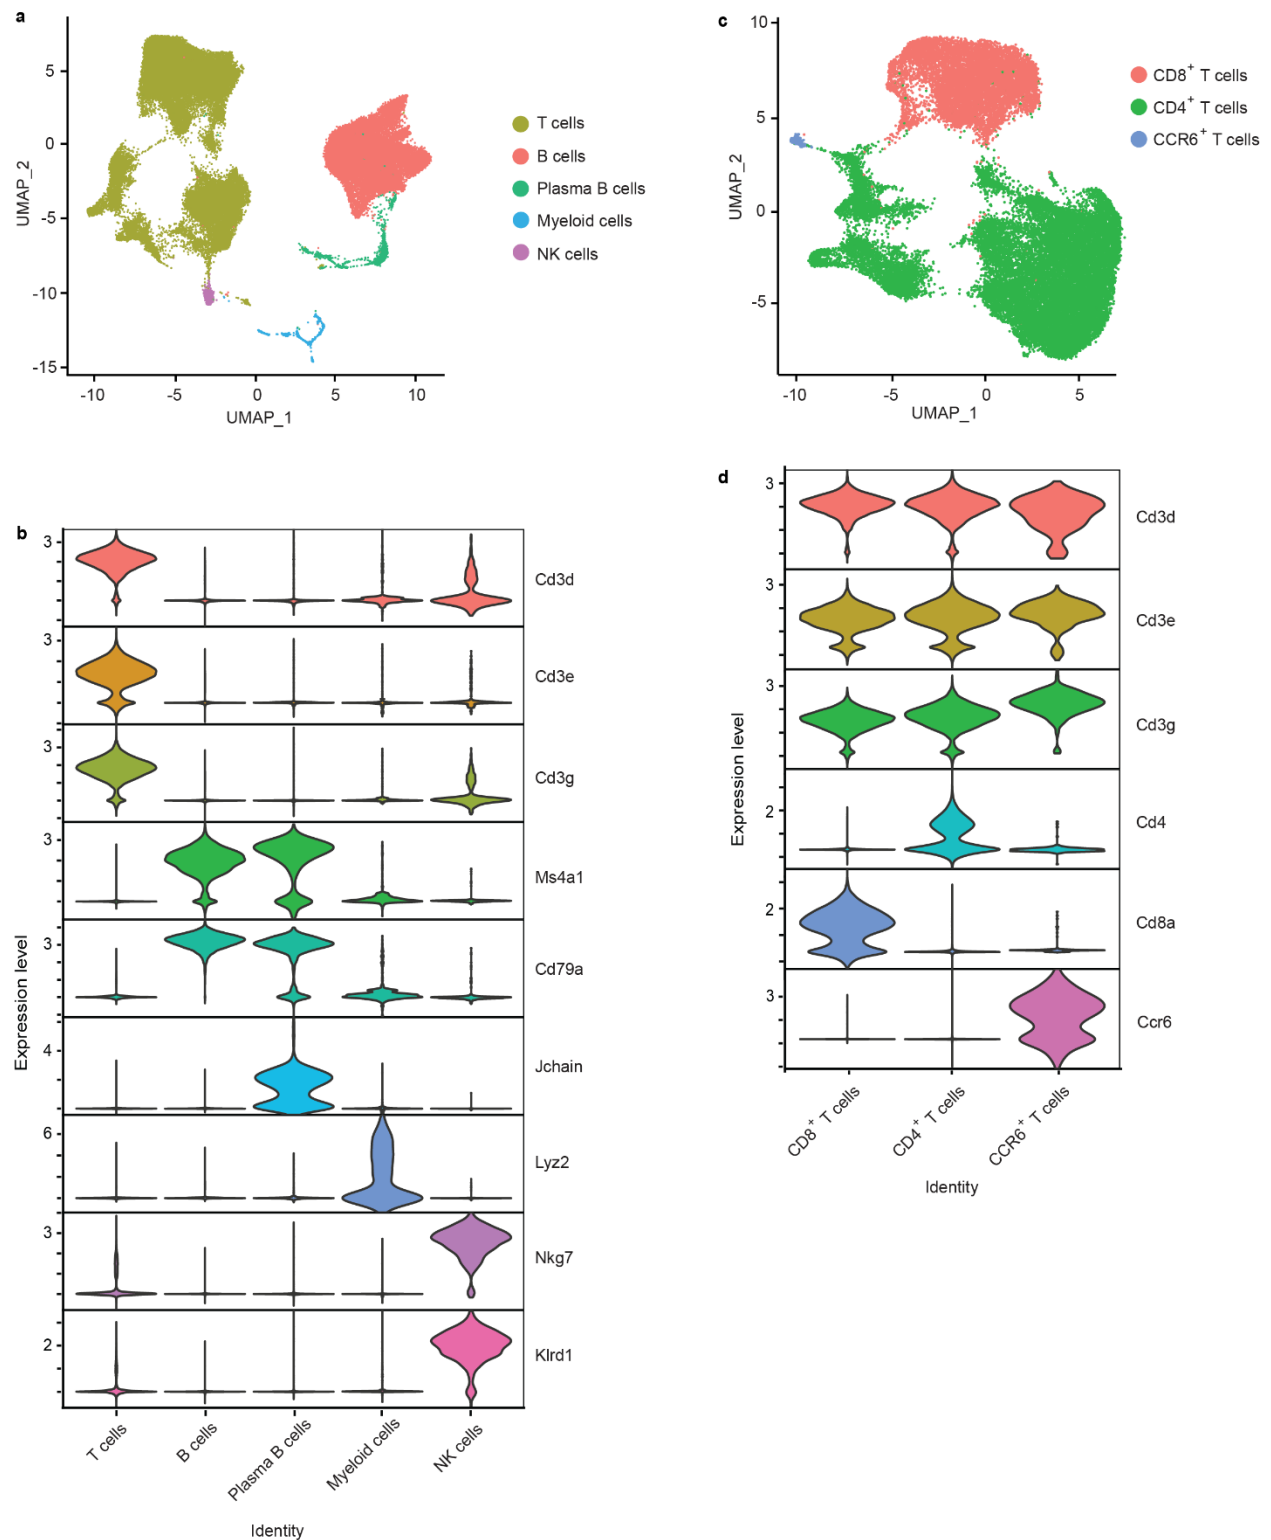

**Supplementary Figure 9. Characterization of cell types and T phenotypes in SLN by scRNA seq.** **a**, UMAP plot showing five cell types in SLN. **b**, Violin plots showing cell-type-specific

genes expressed by five cell types in SLN. **c**, UMAP plot showing three color-coded T phenotypes in SLN. **d**, Violin plots showing cell-type-specific genes expressed by three T phenotypes in SLN.

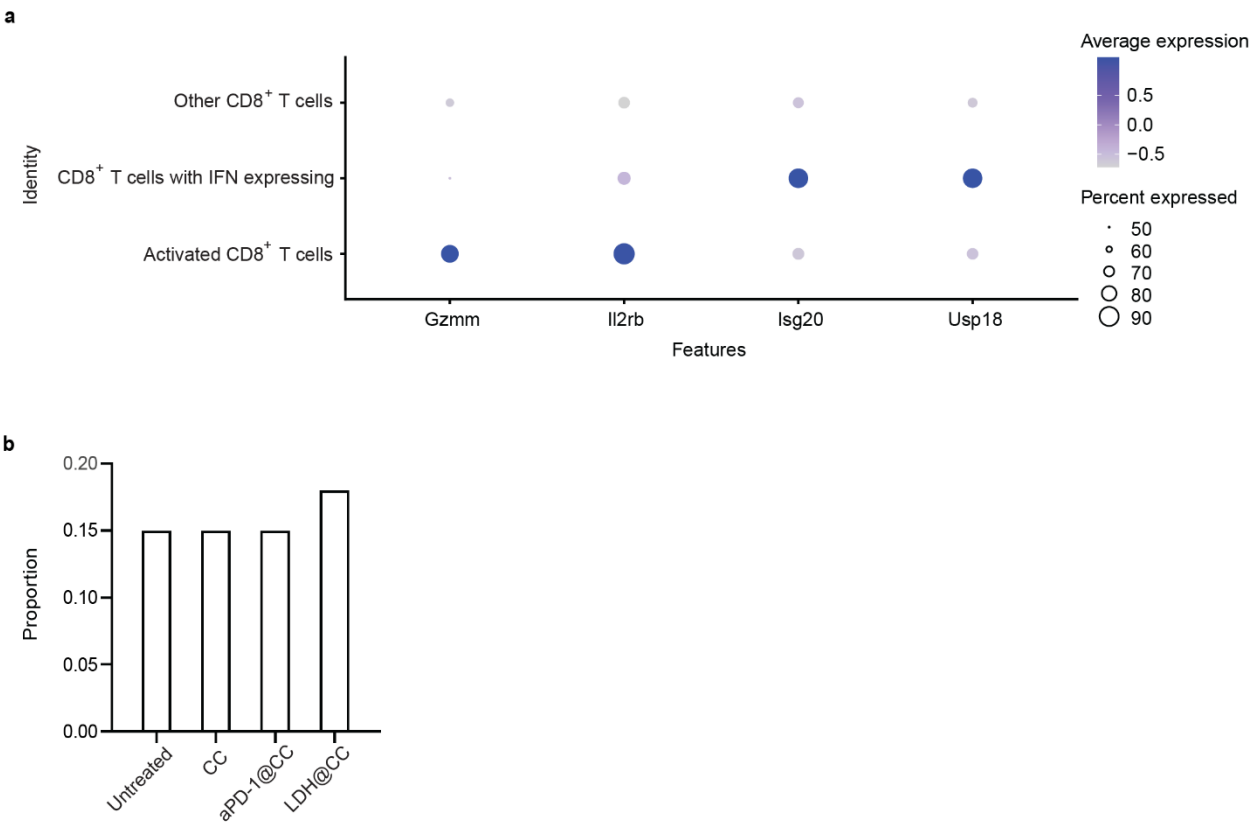

**Supplementary Figure 10. CD8<sup>+</sup> T subclusters in SLN by scRNA seq.** **a**, Expression heatmap of cell-type-specific genes in two identified CD8<sup>+</sup> T subclusters. Columns represent different subclusters and rows represent signature genes. **b**, The proportion of activated CD8<sup>+</sup> T cells on total CD8<sup>+</sup> T cells per group. Source data are provided as a Source Data file.

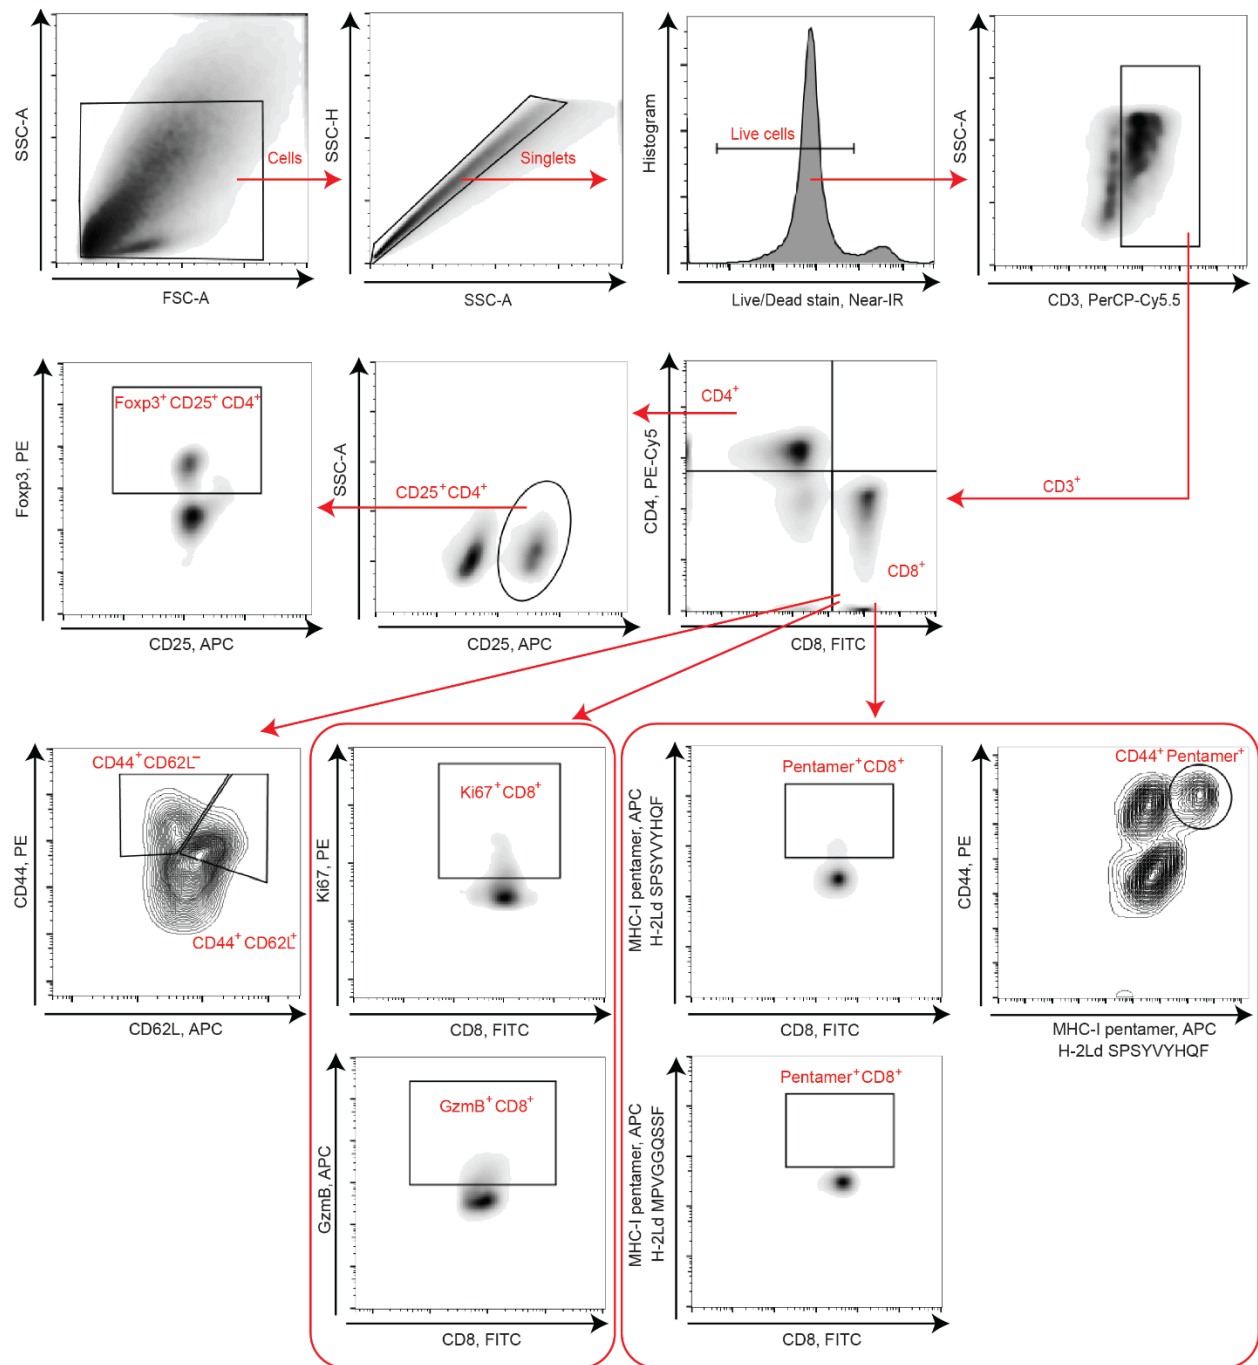

**Supplementary Figure 11. Gating strategy in SLN.** Representative flow cytometric plots showing the gating strategy to identify CD8<sup>+</sup>, CD4<sup>+</sup> subsets in SLN.

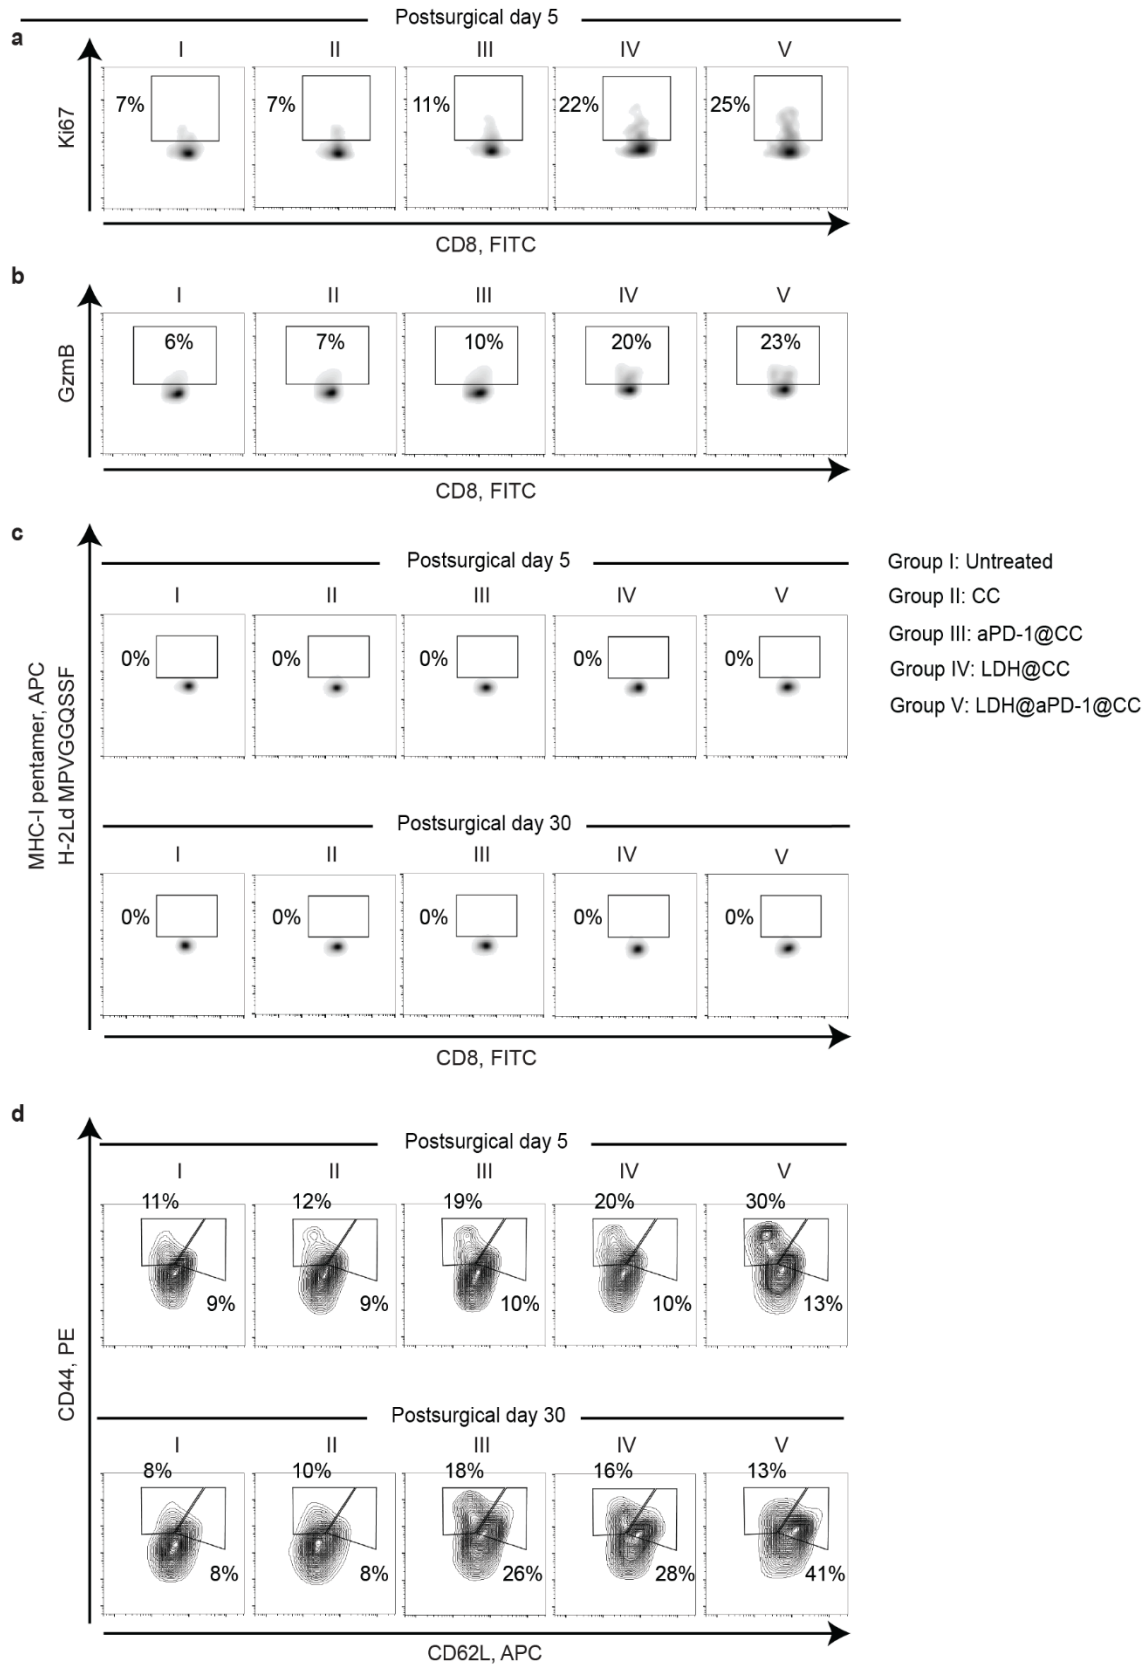

**Supplementary Figure 12. Representative flow cytometric plots of CD8<sup>+</sup> subsets in SLN.** SLNs in each group were harvested on postsurgical days 5 and 30. **a-d**, Representative flow cytometric plots of Ki67<sup>+</sup>CD8<sup>+</sup> T cells (**a**), GzmB<sup>+</sup>CD8<sup>+</sup> T cells (**b**), H-2Ld MPVGGQSSF-pentamer<sup>+</sup>CD8<sup>+</sup> T cells (**c**), effector memory (T<sub>em</sub>; CD62L<sup>-</sup>CD44<sup>+</sup>) and central memory (T<sub>cm</sub>; CD62L<sup>+</sup>CD44<sup>+</sup>) CD8<sup>+</sup> T cells (**d**), gating on CD8<sup>+</sup>CD3<sup>+</sup> cells. n = 5 mice per group.

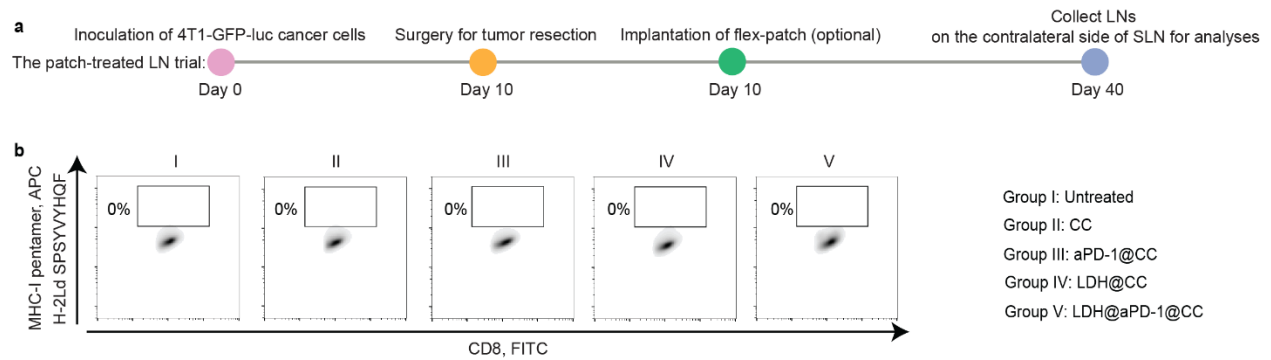

**Supplementary Figure 13. Analyses of the LNs on the contralateral side of SLNs.** **a**, Schematic illustrating the LN survey on the 4T1 BC mouse model after surgery, including no patch implantation (untreated, Group I) and patches with different therapeutic agents (CC, Group II; aPD-1@CC, Group III; LDH@CC, Group IV; and LDH@aPD-1@CC, Group V). **b**, Representative flow cytometric plots of H-2Ld SPSYVYHQF-pentamer<sup>+</sup>CD8<sup>+</sup> T cells, gating on CD8<sup>+</sup>CD3<sup>+</sup> cells, on Day 30 postsurgery. n = 5 mice per group.

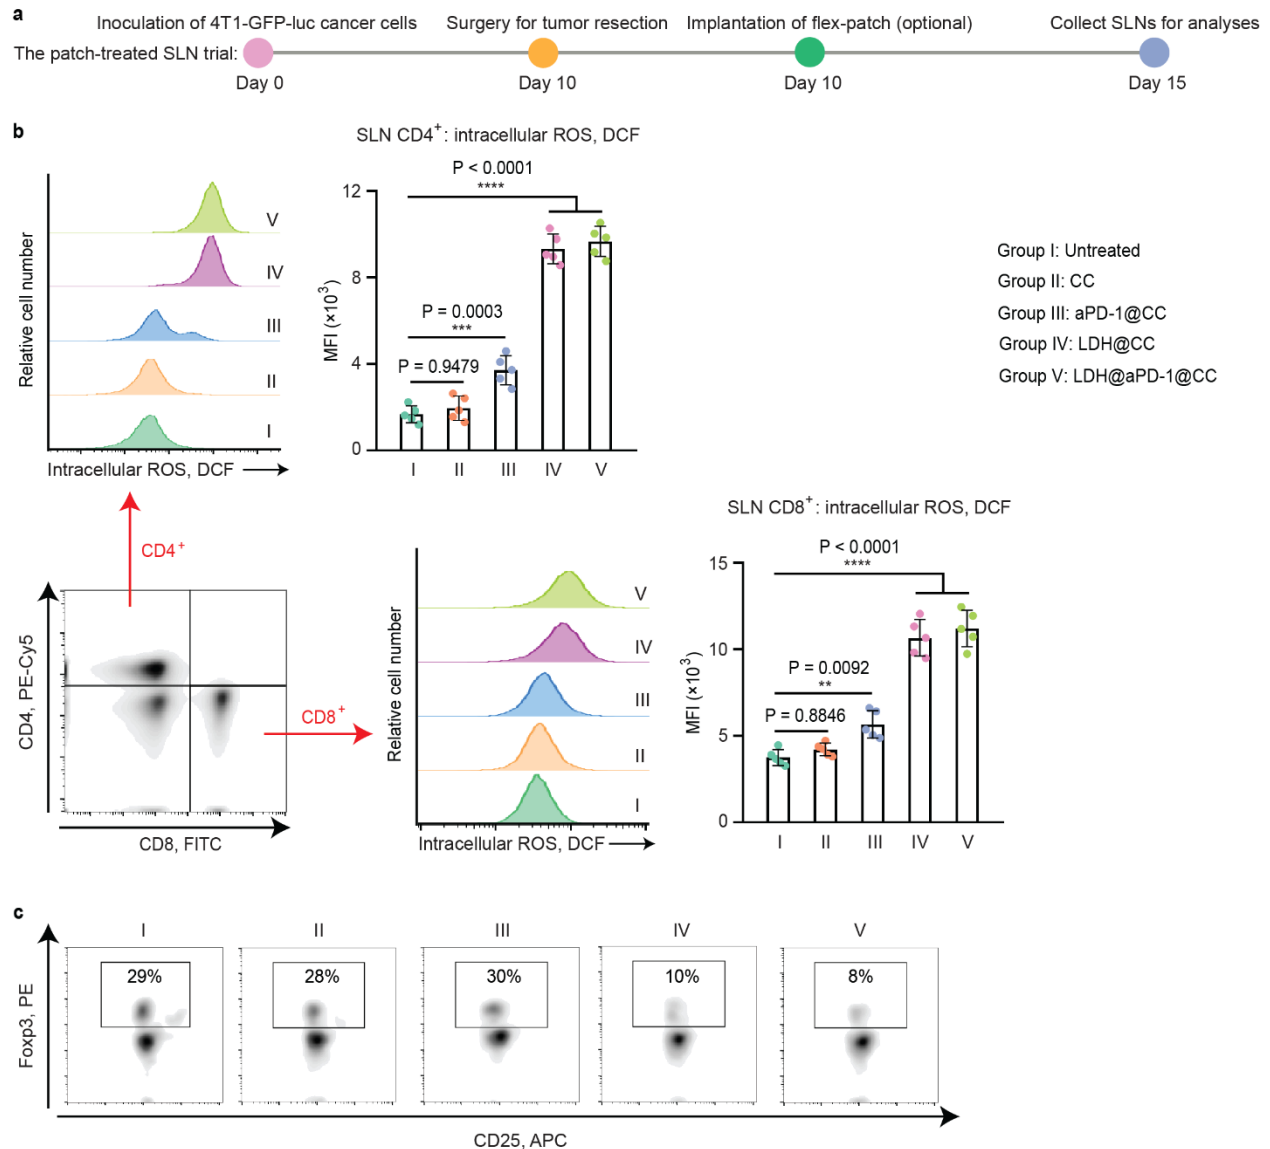

**Supplementary Figure 14. ROS-relevant characterizations of patch-treated SLNs.** SLNs in each group were harvested on Day 5 postsurgery. **a**, Schematic illustrating the SLN survey on the 4T1 BC mouse model after surgery, including no patch implantation (untreated, Group I) and patches with different therapeutic agents (CC, Group II; aPD-1@CC, Group III; LDH@CC, Group IV; and LDH@aPD-1@CC, Group V). **b**, Representative histograms and quantification of the intracellular ROS levels in CD8<sup>+</sup> T cells and CD4<sup>+</sup> T cells from SLN.  $n = 5$  mice per group. Data are presented as the mean  $\pm$  SD, and statistical significance was calculated via one-way ANOVA with Tukey's multiple comparisons. **c**, Representative flow cytometric plots of Foxp3<sup>+</sup>CD25<sup>+</sup>CD4<sup>+</sup> T cells, gating on CD4<sup>+</sup>CD3<sup>+</sup> cells.  $n = 5$  mice per group. Source data are provided as a Source Data file.

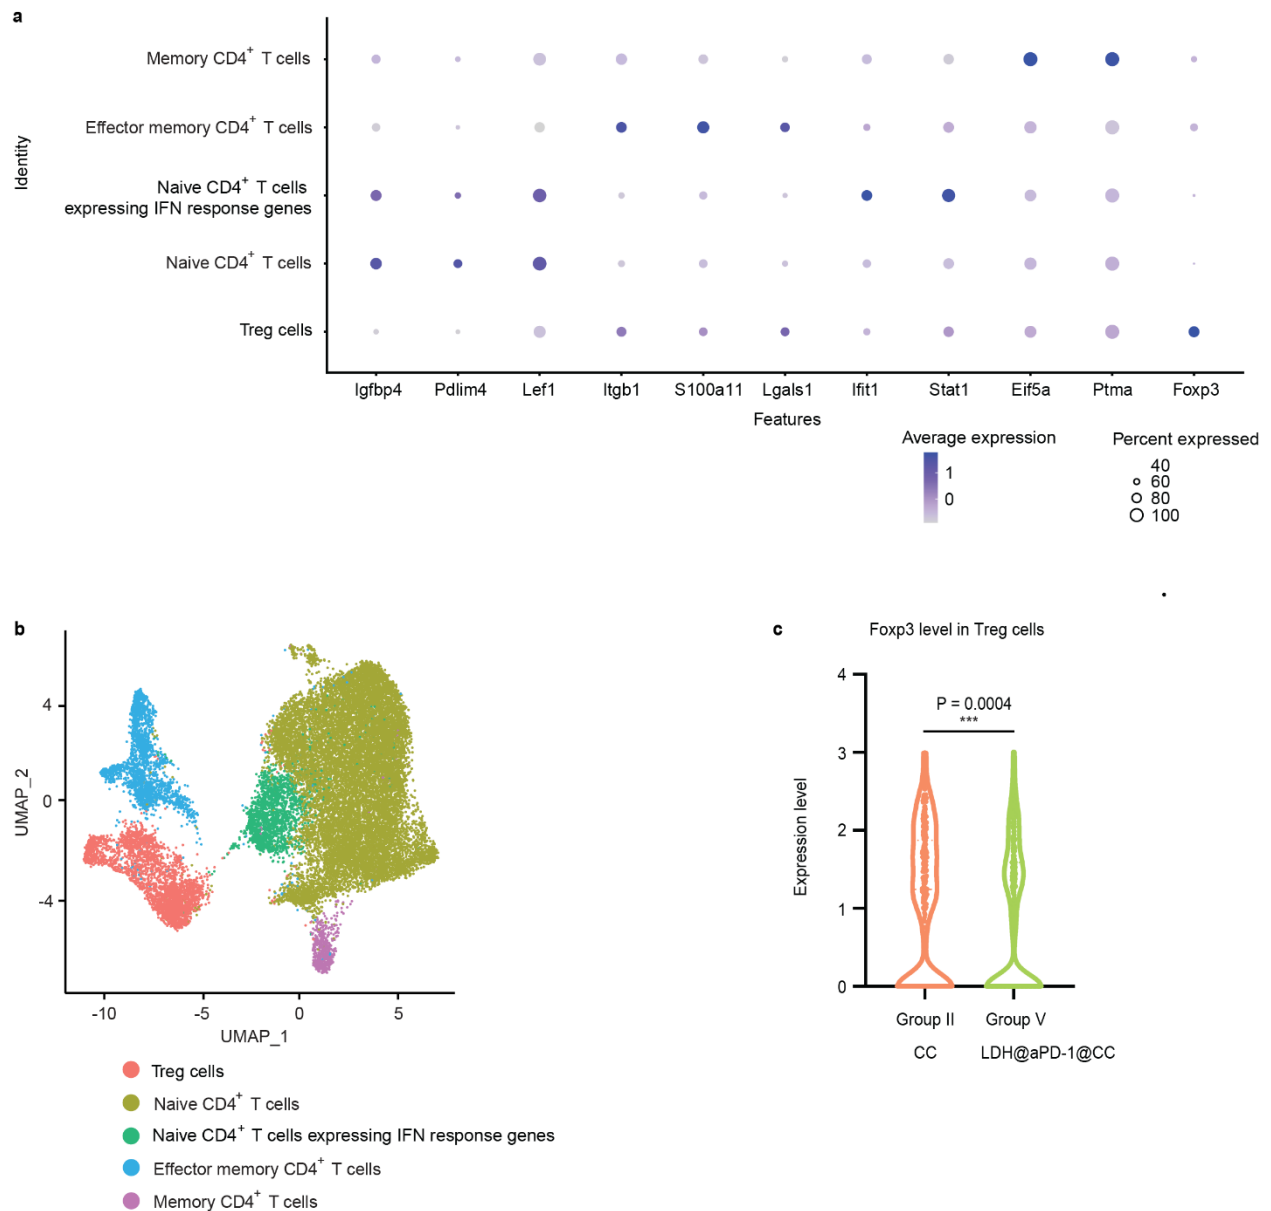

**Supplementary Figure 15. Analyses of Treg cells by scRNA seq. a,b,** Expression heatmap of cell-type-specific genes in five CD4<sup>+</sup> T subclusters (**a**) with their UMAP plot (**b**). Columns represent different subclusters and rows represent signature genes. **c,** Foxp3 expression level in Treg cells. Statistical significance was calculated via unpaired two-tailed t-test. Source data are provided as a Source Data file.

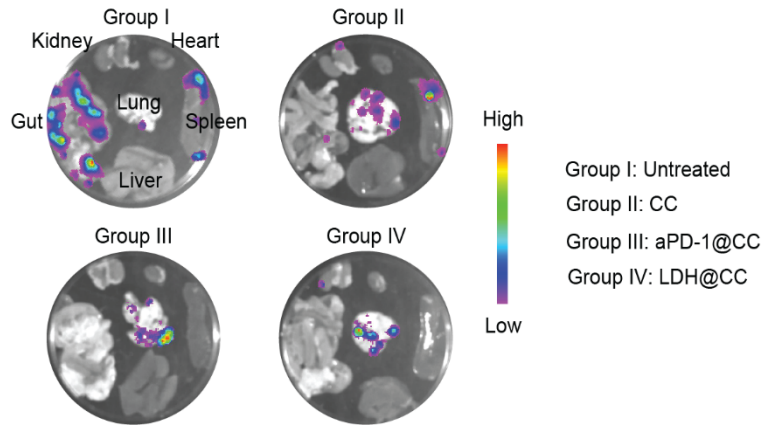

**Supplementary Figure 16. Postsurgical 4T1-BC treatment of flex-patch.** Representative bioluminescence images of visceral organs of tumor mice in groups I-IV.

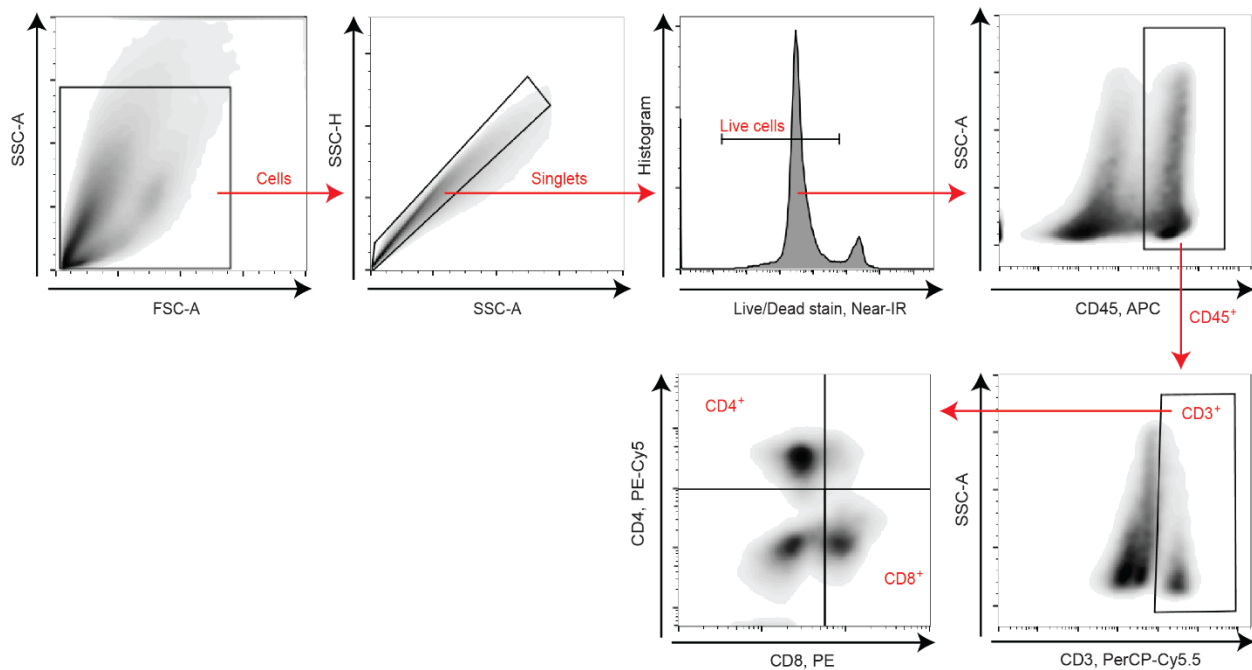

**Supplementary Figure 17. Gating strategy in postsurgical 4T1 tumor.** Representative flow cytometric plots showing the gating strategy used to identify  $CD8^+CD3^+CD45^+$  in postsurgical 4T1 tumor.

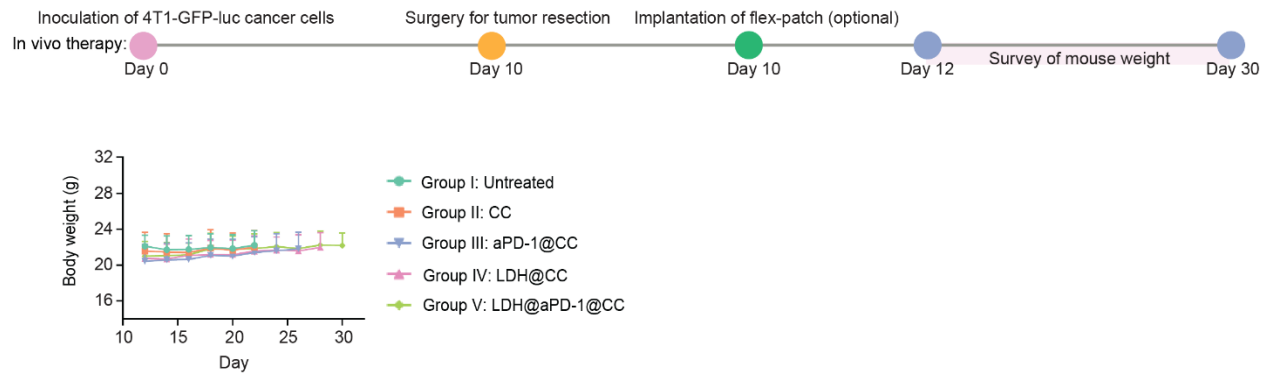

### Supplementary Figure 18. Therapeutic influence of flex-patch on the weight of 4T1 BC mice.

Weight changes of 4T1 BC mice after the surgery and optional patch implantation detailed in the schematic process, including no patch (untreated, Group I) and patches with different therapeutic agents (CC, Group II; aPD-1@CC, Group III; LDH@CC, Group IV; and LDH@aPD-1@CC, Group V).  $n = 12$  mice per group. Weighing stopped when the first mouse in the group was euthanized. Data are presented as the mean  $\pm$  SD. Source data are provided as a Source Data file.

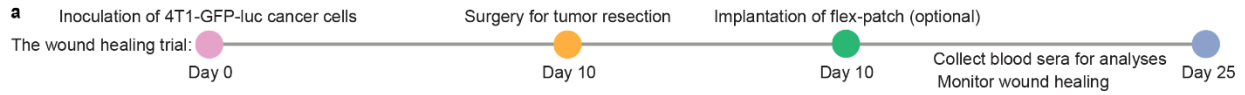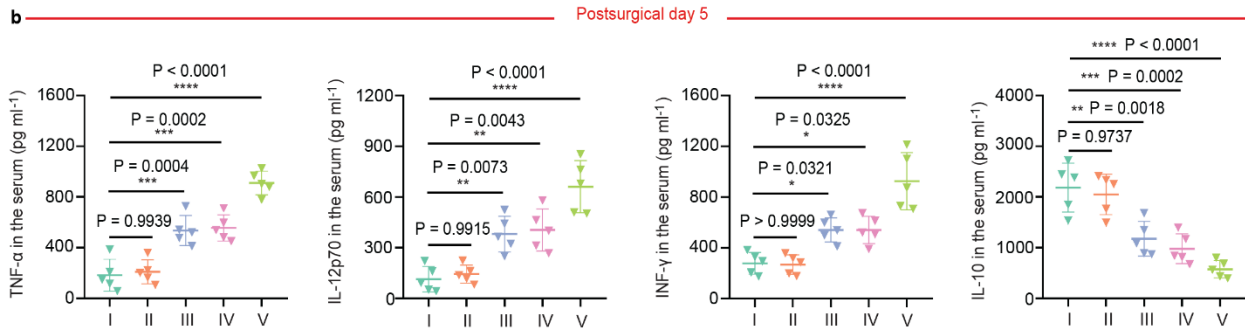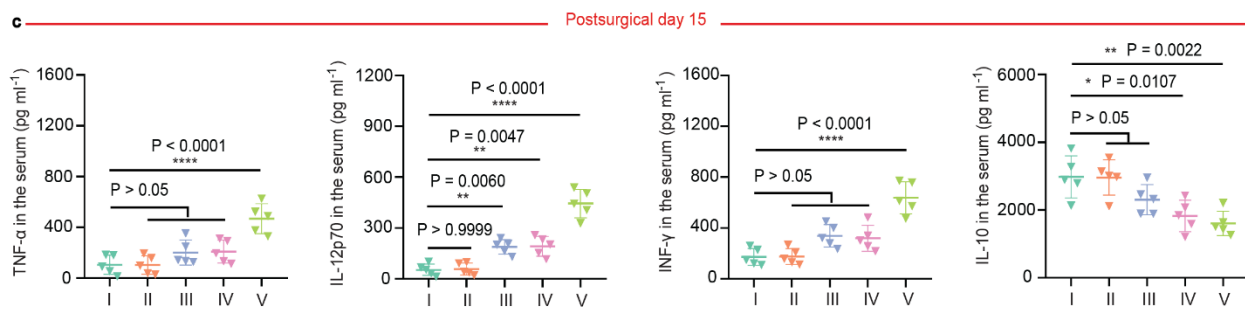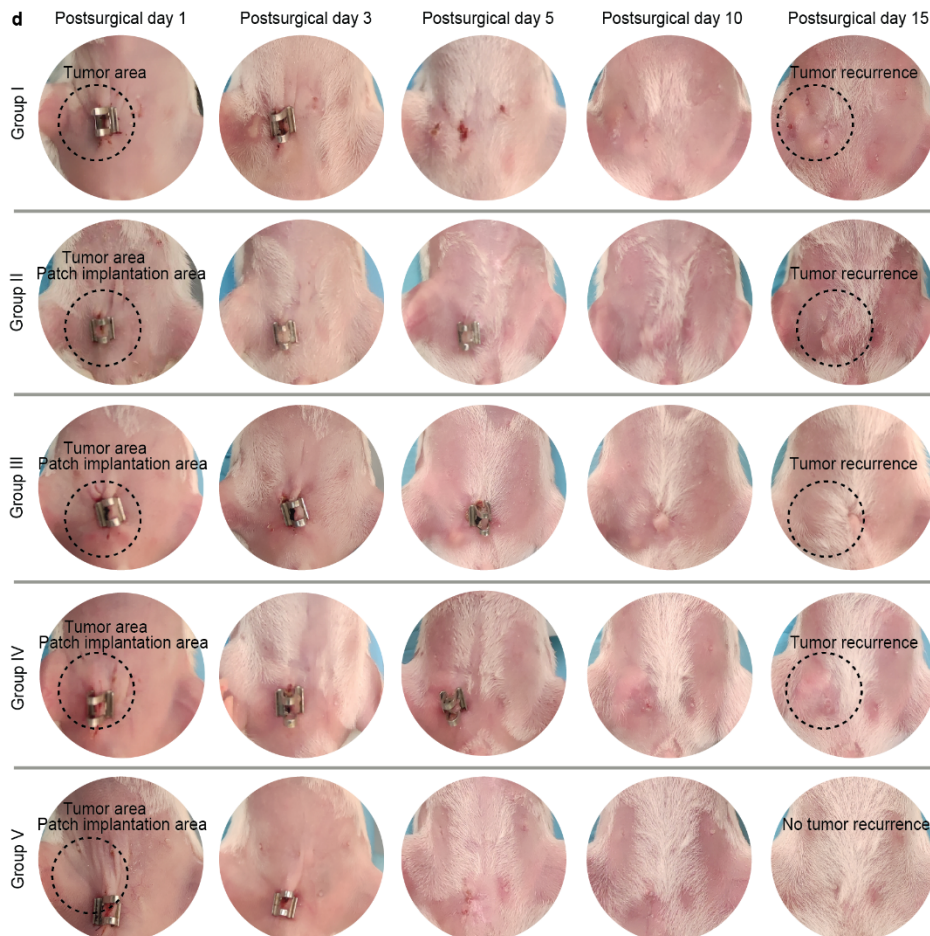

Group I: Untreated  
Group II: CC  
Group III: aPD-1@CC  
Group IV: LDH@CC  
Group V: LDH@aPD-1@CC

**Supplementary Figure 19. Analyses of hemal cytokines and postsurgical wound.** **a**, Schematic illustrating the route of blood sera assay and wound-healing monitoring in the 4T1 BC mouse model after surgery, including no patch implantation (untreated, Group I) and patches with different therapeutic agents (CC, Group II; aPD-1@CC, Group III; LDH@CC, Group IV; and LDH@aPD-1@CC, Group V). n = 5 mice per group. **b,c**, Hematic TNF- $\alpha$ , IL-12, IFN- $\gamma$ , and IL-10 levels on Day 5 (**b**) and Day 15 (**c**) postsurgery. 100  $\mu$ L of blood per mouse was collected on each time point through tail vein. n = 5 mice per group; data are presented as the mean  $\pm$  SD; statistical significance was calculated via one-way ANOVA with Tukey's multiple comparisons. **d**, Photographs of postsurgical wound per mouse during the treating process in (**a**). Source data are provided as a Source Data file.

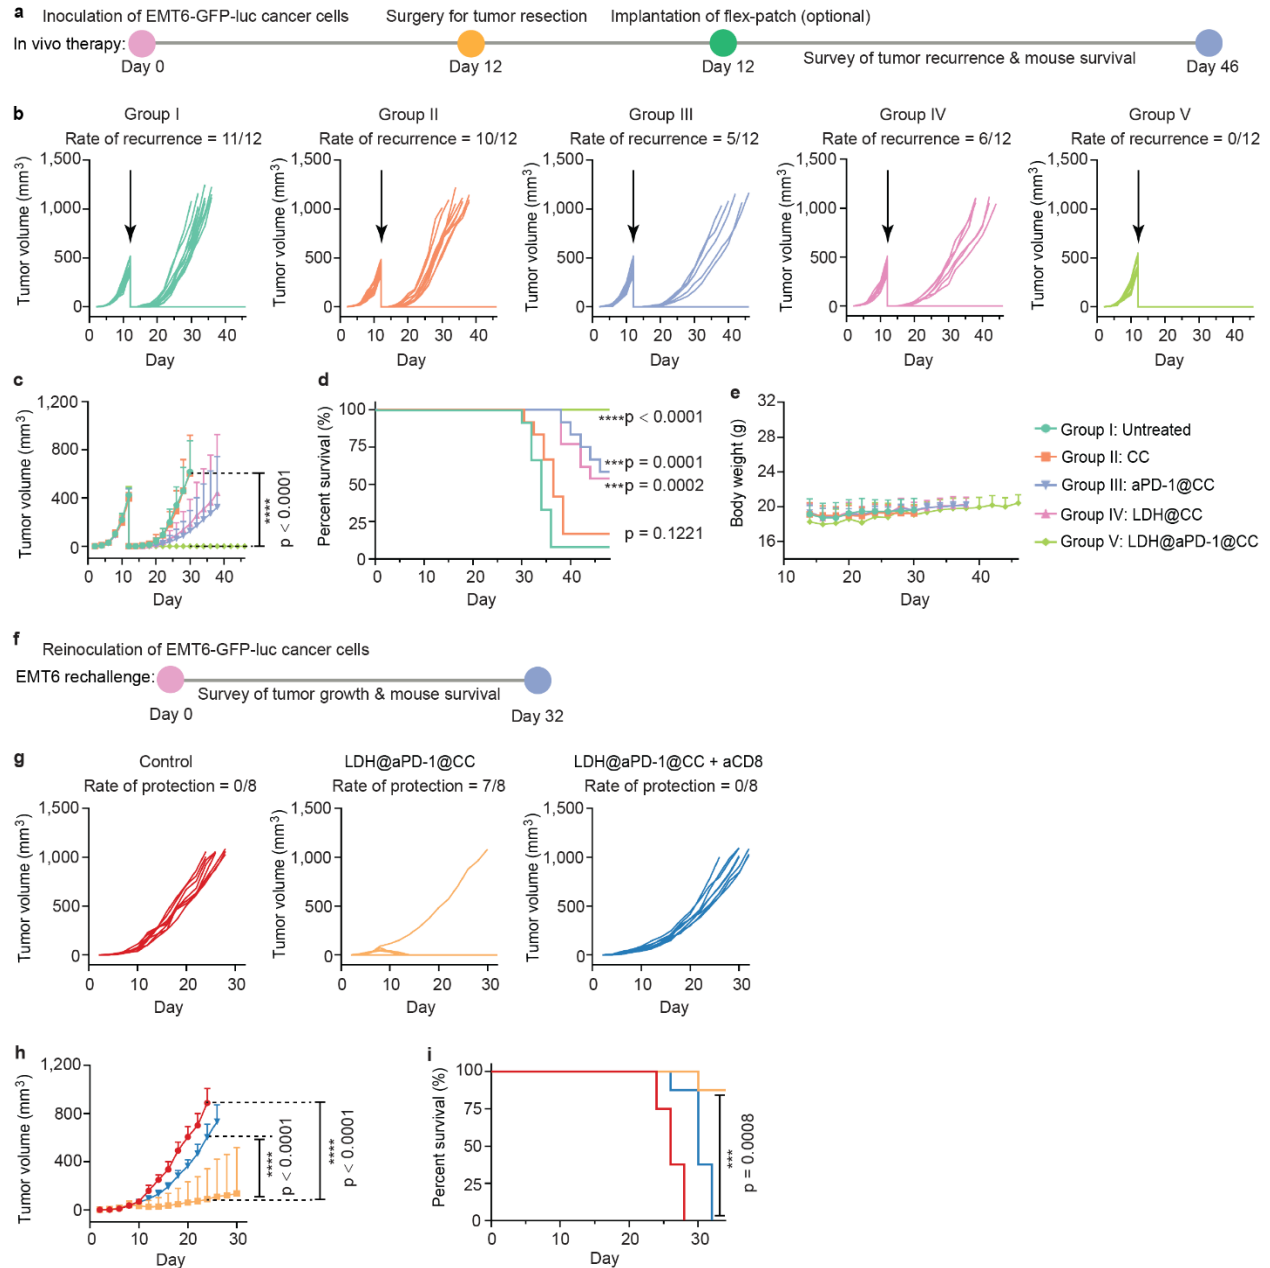

**Supplementary Figure 20. Postsurgical EMT6-BC treatment of flex-patch.** **a**, Schematic illustrating therapeutic procedure on the EMT6 BC mouse model after surgery, including no patch implantation (untreated, Group I) and patches with different therapeutic agents (CC, Group II; aPD-1@CC, Group III; LDH@CC, Group IV; and LDH@aPD-1@CC, Group V).  $n = 12$  mice per group. **b,c**, Individual (**b**) and average (**c**) tumor growth kinetics per group. **d,e**, Mouse survival (**d**) and weight changes (**e**) per group. **f**, Schematic illustrating the route of the EMT6 tumor rechallenge assay. Apart from the control group, all tumor-free mice were harvested from Group

V (LDH@aPD-1@CC). n = 8 mice per group. **g,h**, Individual (**g**) and average (**h**) tumor growth kinetics per group. **i**, Mouse survival in different rechallenge groups. For (**c,e,h**), the curve ended when the first mouse in the corresponding group died. Data are presented as the mean  $\pm$  SD. Statistical significance was calculated via one-way ANOVA with Tukey's multiple comparisons. For (**d,i**), statistical significance was calculated via the log-rank (Mantel–Cox) test by comparison with the untreated Group I (or the control group). Source data are provided as a Source Data file.

**Supplementary Table 1. Table of chemical reagents and functional kits**

| <b>Reagent</b>                                       | <b>Cat #</b> | <b>Supplier</b> |
|------------------------------------------------------|--------------|-----------------|
| Magnesium nitrate hexahydrate                        | 13446-18-9   | Sigma-Aldrich   |
| Magnesium chloride hexahydrate                       | 7791-18-6    | Sigma-Aldrich   |
| Iron(III) nitrate nonahydrate                        | 7782-61-8    | Sigma-Aldrich   |
| Iron(III) chloride hexahydrate                       | 10025-77-1   | Sigma-Aldrich   |
| Sodium hydroxide                                     | 1310-73-2    | Sigma-Aldrich   |
| Carboxylated chitosan                                | 9012-76-4    | Aladdin         |
| Avertin                                              | 75-80-9      | Sigma-Aldrich   |
| Sodium Pyruvate                                      | P4562-25g    | Sigma-Aldrich   |
| $\beta$ -Mercaptoethanol                             | M3148        | Sigma-Aldrich   |
| L-Glutathione reduced                                | G6013-10G    | Sigma-Aldrich   |
| Phorbol 12-myristate 13-acetate (PMA)                | P849986-1mg  | Macklin         |
| Ionomycin                                            | I838446-1mg  | Macklin         |
| Poly-D-lysine                                        | E607014      | Sangon Biotech  |
| 2',7'-Dichlorofluorescein diacetate (DCFHDA)         | 35845        | Sigma-Aldrich   |
| Mouse IL-2 ELISA kit                                 | LEM020-2     | Laizee          |
| Mouse IgG ELISA kit                                  | EMC116(H)    | Invitrogen      |
| Mouse IL-10 ELISA kit                                | EMC005.95.2  | NeoBioscience   |
| Mouse TNF- $\alpha$ ELISA kit                        | EMC102a.96.2 | NeoBioscience   |
| Mouse IL-6 ELISA kit                                 | EMC004.96.2  | NeoBioscience   |
| Mouse IL-12p70 ELISA kit                             | EMC006.96.2  | NeoBioscience   |
| Mouse IFN- $\gamma$ ELISA kit                        | EMC101g.96.2 | NeoBioscience   |
| EasySep™ Mouse CD8 <sup>+</sup> T cell isolation kit | 19853        | Stemcell        |
| CytoTox 96® non-radioactive cytotoxicity assay kit   | G1780        | Promega         |

|                                                |          |                                               |
|------------------------------------------------|----------|-----------------------------------------------|
| Nuclear and cytoplasmic protein extraction kit | P0028    | Beyotime                                      |
| QuantiTect reverse transcription kit           | 205311   | Qiagen                                        |
| Pierce BCA protein assay kit                   | 23225    | Thermo Fisher Scientific                      |
| Glutathione assay kit                          | 703002   | Cayman Chemical                               |
| LIVE/DEAD™ fixable near-IR dead cell stain kit | L10119   | Invitrogen                                    |
| BUN assay kit                                  | C013-2-1 | NanJing JianCheng<br>Bioengineering Institute |
| CRE assay kit                                  | C011-2-1 | NanJing JianCheng<br>Bioengineering Institute |
| CK assay kit                                   | A032-1-1 | NanJing JianCheng<br>Bioengineering Institute |
| LADH assay kit                                 | A020-1   | NanJing JianCheng<br>Bioengineering Institute |
| AST assay kit                                  | C010-2-1 | NanJing JianCheng<br>Bioengineering Institute |
| ALT assay kit                                  | C009-2-1 | NanJing JianCheng<br>Bioengineering Institute |

**Supplementary Table 2. Table of antibodies**

| <b>Target</b> | <b>Cat #</b> | <b>Clone</b> | <b>Supplier</b>           | <b>Fluor</b> | <b>Dilution ratio</b>                           |
|---------------|--------------|--------------|---------------------------|--------------|-------------------------------------------------|
| PD-1          | P372         | RMP1-14      | Leinco                    | none         | No dilution<br>(used for the flex-patch design) |
| PD-1          | 11-9985-82   | J43          | eBioscience               | yes          | 1:50                                            |
| PD-1          | 17-9981-82   | RMP1-30      | eBioscience               | yes          | 1:20                                            |
| PD-1          | 12-9985-82   | J43          | eBioscience               | yes          | 1:40                                            |
| PD-1          | ab214421     | EPR20665     | abcam                     | none         | 1:200                                           |
| CD16/32       | 156604       | S17011E      | BioLegend                 | none         | 1:200                                           |
| CD8           | F398-84A-G   | KT15         | Proimmune                 | yes          | 1:60                                            |
| CD8           | 45-0081-82   | 53-6.7       | eBioscience               | yes          | 1:80                                            |
| CD8           | 12-0081-83   | 53-6.7       | eBioscience               | yes          | 1:80                                            |
| CD8           | 85336        | D8A8Y        | Cell signaling technology | none         | 1:400                                           |
| CD3           | 45-0031-82   | 145-2C11     | eBioscience               | yes          | 1:20                                            |
| CD3           | 11-0031-85   | 145-2C11     | eBioscience               | yes          | 1:100                                           |
| CD3           | 100340       | 145-2C11     | Biolegend                 | none         | 1:492                                           |
| CD3           | 78588        | E4T1B        | Cell signaling technology | none         | 1:400                                           |
| Ki67          | 652404       | 16A8         | BioLegend                 | yes          | 1:50                                            |
| Ki67          | ab16667      | SP6          | abcam                     | none         | 1:300                                           |
| Granzyme B    | 372204       | QA16A02      | BioLegend                 | yes          | 1:20                                            |
| CD44          | 12-0441-82   | IM7          | eBioscience               | yes          | 1:150                                           |
| CD62L         | 17-0621-82   | MEL-14       | eBioscience               | yes          | 1:300                                           |
| CD62L         | 25-0621-82   | MEL-14       | eBioscience               | yes          | 1:80                                            |
| CD4           | 17-0041-83   | GK1.5        | eBioscience               | yes          | 1:150                                           |
| CD4           | 15-0041-83   | GK1.5        | eBioscience               | yes          | 1:300                                           |

|                                       |              |             |                              |      |        |
|---------------------------------------|--------------|-------------|------------------------------|------|--------|
| Foxp3                                 | 12-5773-82   | FJK-16s     | eBioscience                  | yes  | 1:20   |
| CD45                                  | 17-0451-82   | 30-F11      | eBioscience                  | yes  | 1:150  |
| CD45                                  | 45-0451-82   | 30-F11      | eBioscience                  | yes  | 1:150  |
| NFAT1                                 | MA1-025      | 25A10.D6.D2 | Invitrogen                   | none | 1:1000 |
| PCNA                                  | ARG62605     | PC10        | Arigo<br>biolaboratories     | none | 1:1000 |
| Cleaved<br>caspase-3 (CC3)            | 9661         | Asp175      | Cell signaling<br>technology | none | 1:500  |
| GFP                                   | sc-9996      | B-2         | Santa cruz<br>biotechnology  | none | 1:200  |
| $\beta$ -actin                        | 3700         | 8H10D10     | Cell signaling<br>technology | none | 1:2000 |
| CD28                                  | 553295       | 37.51       | BD<br>Pharmlngen             | none | 1:200  |
| CD25                                  | 20-0251-U100 | PC61.5      | Tonbo<br>Bioscience          | yes  | 1:600  |
| CD69                                  | 12-0691-82   | H1.2F3      | eBioscience                  | yes  | 1:350  |
| CD107a                                | 121614       | 1D4B        | BioLegend                    | yes  | 1:20   |
| Phospho-FAK<br>(Tyr397)               | 700255       | 31H5L17     | Invitrogen                   | none | 1:200  |
| Phospho-<br>ERK1/2<br>(Thr202/Tyr204) | 369504       | 6B8B69      | BioLegend                    | yes  | 1:20   |

**Supplementary Table 3. Table of cell lines and products for cell culture**

| <b>Product name</b>                         | <b>Cat #</b> | <b>Supplier</b>                                  |
|---------------------------------------------|--------------|--------------------------------------------------|
| 4T1 cell line                               | CRL-2539     | the American Type Culture Collection             |
| 4T1-GFP-luc cell line                       |              | generated by Dr. Kai Miao at University of Macau |
| EMT6 cell line                              | CRL-2755     | the American Type Culture Collection             |
| EMT6-GFP-luc cell line                      |              | generated by Dr. Kai Miao at University of Macau |
| RAW264.7 cell line                          | TIB-71       | the American Type Culture Collection             |
| B16F10 cell line                            | CRL-6475     | the American Type Culture Collection             |
| Roswell Park Memorial Institute 1640 Medium | 11875-093    | Gibco                                            |
| Dulbecco's Modified Eagle's Medium          | 11965-092    | Gibco                                            |
| DMEM/F-12 Medium                            | 11330032     | Gibco                                            |
| Fetal bovine serum                          | 26140079     | Gibco                                            |
| Penicillin-streptomycin                     | 15140122     | Gibco                                            |

**Supplementary Table 4. Table of bioactive products and consumables**

| <b>Product name</b>                            | <b>Cat #</b> | <b>Supplier</b>                                              |
|------------------------------------------------|--------------|--------------------------------------------------------------|
| Pro5 MHC-I pentamer (H-2Ld SPSYVYHQF)          | F398-84A-G   | Proimmune                                                    |
| Pro5 MHC-I pentamer (H-2Ld MPVGGQSSF)          | F158-84A-G   | Proimmune                                                    |
| SPSYVYHQF peptide                              |              | custom-made in<br>Suzhou Bestbiochem<br>Pharma-tech Co., Ltd |
| FastStart universal SYBR green master          | 4913850001   | Roche Diagnostics                                            |
| VivoGlo™ Luciferin                             | P1043        | Promega                                                      |
| Collagenase type III                           | LS0004182    | Worthington                                                  |
| Hyaluronidase                                  | H3506        | Sigma-Aldrich                                                |
| Insulin                                        | I1882        | Sigma-Aldrich                                                |
| Epidermal growth factor protein                | PHG0311L     | Gibco                                                        |
| Hydrocortisone                                 | H0888        | Sigma-Aldrich                                                |
| Dispase II                                     | 04942078001  | Roche                                                        |
| DNase I                                        | 58C10349     | Worthington                                                  |
| Red blood cell lysis buffer                    | 00433357     | Invitrogen                                                   |
| Foxp3/transcription factor staining buffer set | 00-5523-00   | eBioscience                                                  |
| PF-562271 (FAK inhibitor)                      | S2890        | Selleckchem                                                  |
| 11R-VIVIT TFA (NFAT inhibitor)                 | P1210        | Selleckchem                                                  |
| Slide-A-Lyzer MINI dialysis device (3.5K MWCO) | 88400        | Thermo Fisher<br>Scientific                                  |
| Snakeskin dialysis membrane                    | 68035        | Thermo Fisher<br>Scientific                                  |
| 12-well Transwell plate                        | 3462         | Costar                                                       |
| 70-µm cell strainer                            | 52350        | Falcon                                                       |

## References

1. Choy, J. H., Kwak, S. Y., Jeong, Y. J. & Park, J. S. Inorganic layered double hydroxides as nonviral vectors. *Angew. Chem. Int. Ed.* **39**, 4042-4045 (2000).
2. King, B. F. et al. Antagonism of ATP responses at P2X receptor subtypes by the pH indicator dye, phenol red. *Brit. J. Pharmacol.* **145**, 313-322 (2005).
